# Supplementary material for: A high-tap-density nanosphere-assembled microcluster to simultaneously enable high gravimetric, areal and volumetric capacities: a case study of TiO2 anode
Source: Royal Society of Chemistry journal article supplement (doi:10.1039/c8ta02554a), 2018-01-01
Supplement: c8ta02554a1.pdf [file c8ta02554a1.pdf]

## **A high-tap-density nanosphere-assembled microcluster to simultaneously enable high gravimetric, areal and volumetric capacities: A case study of TiO<sub>2</sub> anode**

Baisong Chang<sup>a,c</sup>, Jinping Liu<sup>a,b</sup>, Guangyan Qing<sup>a</sup>, and Taolei Sun<sup>\*a,b</sup>

<sup>a</sup> State Key Laboratory of Advanced Technology for Materials Synthesis and Processing, Wuhan University of Technology, Wuhan 430070, PR China, E-mail: [suntaolei@iccas.ac.cn](mailto:suntaolei@iccas.ac.cn).

<sup>b</sup> School of Chemistry, Chemical Engineering and Life Science, Wuhan University of Technology, Wuhan 430070, PR China.

<sup>c</sup> State Key Laboratory of Molecular Engineering of Polymers, Fudan University, Shanghai 200433, PR China.

**Keywords:** Bioinspired synthesis, pomegranate-like TiO<sub>2</sub>, microcluster, high-tap-density, high-energy anodes

**Corresponding author:** Taolei Sun, E-mail: [suntl@whut.edu.cn](mailto:suntl@whut.edu.cn).

## Supplementary spectra and images

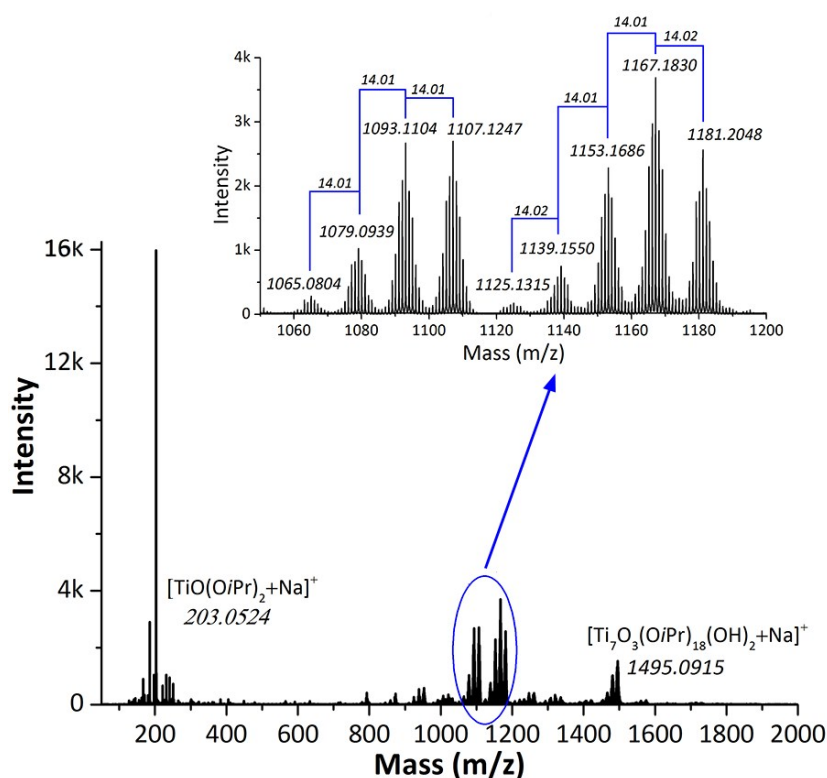

**Fig. S1.** The mass spectrum of TIP diluted in ethanol as a control. MS analysis was carried out on the electrospray hybrid quadrupole time-of-flight mass spectrometer microTOF-Q (Bruker-Daltonik, Germany) equipped with the electrospray ionization (ESI) ion source. The ESI capillary potential was kept at 4500 V (+) ion mode and the sample was continuously introduced into the source at a rate of  $5 \mu\text{L min}^{-1}$ . A flow of drying  $\text{N}_2$  ( $180 \text{ }^\circ\text{C}$ ,  $6 \text{ L min}^{-1}$ ) assisted evaporation of the solvent. The data were collected with a mass range of  $m/z$  50-2000.

The enlarged mass spectra in inset was employed to identify the molecular species. We found that the type of organic solvent used to dissolve TIP played a profound influence on its intrinsic chemical compositions. ESI-MS spectrum of TIP that was dissolved in ethanol showed a dominant peak at  $m/z$  203.0524, corresponding to the adduct ion for  $[\text{TiO}(\text{O}i\text{Pr})_2+\text{Na}]^+$ . It should be noted that another Ti source containing 6-7 Ti atoms was also clearly observed, for example  $[\text{Ti}_7\text{O}_3(\text{O}i\text{Pr})_{18}(\text{OH})_2+\text{Na}]^+$  adducts with a maximum  $m/z$  intensity at 1495.0915. Most interestingly, it was possible to demonstrate the existence of different titanium species originating from the exchange between ethanol and the  $-\text{O}i\text{Pr}$  group ( $m/z$  range from 1050 to 1200) (inset in Fig. S1). The fixed decrease of 14.01  $m/z$  unit was a convincing result that confirmed a step by step substitution of  $-\text{O}i\text{Pr}$  ligand (up to four) through  $-\text{OCH}_2\text{CH}_3$  group of ethanol solvent according to the eqn (1):

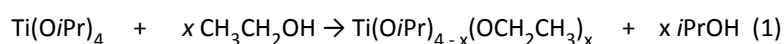

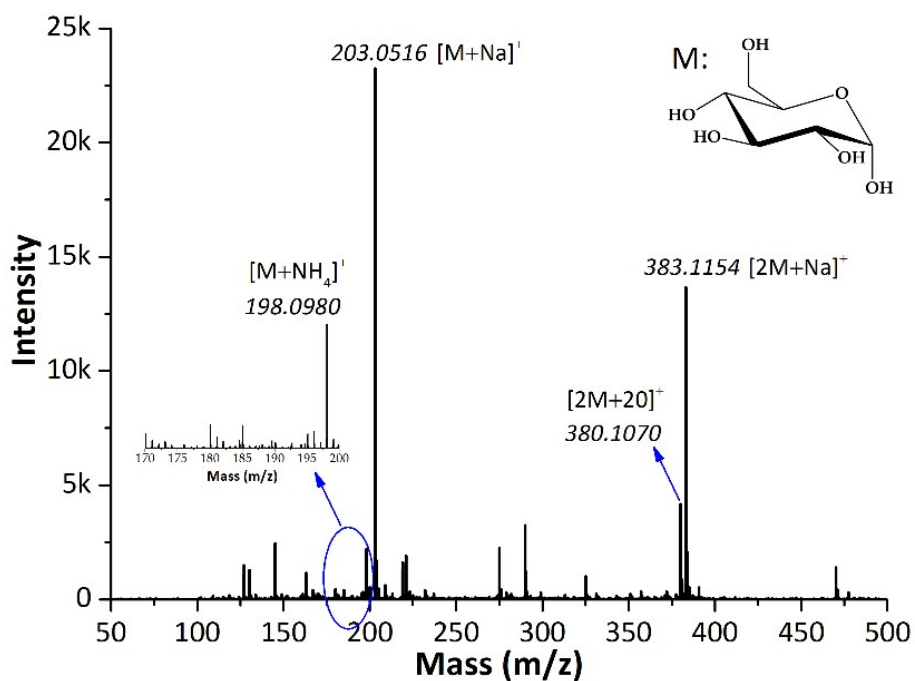

**Fig. S2.** Mass spectrum of glucose in a positive ion mode. For pure glucose, the abundance of [M+Na]<sup>+</sup> adduct of at m/z 203.0516 was the most probable species present, which gave rise to a substantial contrast to GlcN with respect to the type of ions signals. For example, the positive electrospray ionization of GlcN mainly produced protonated a molecular ion of [M+H]<sup>+</sup> at m/z 180.0867 (Fig. 1b). The difference in ion signals could serve as a characteristic index to evaluate whether the -NH<sub>2</sub> group was successfully connected onto glucose molecules or not.

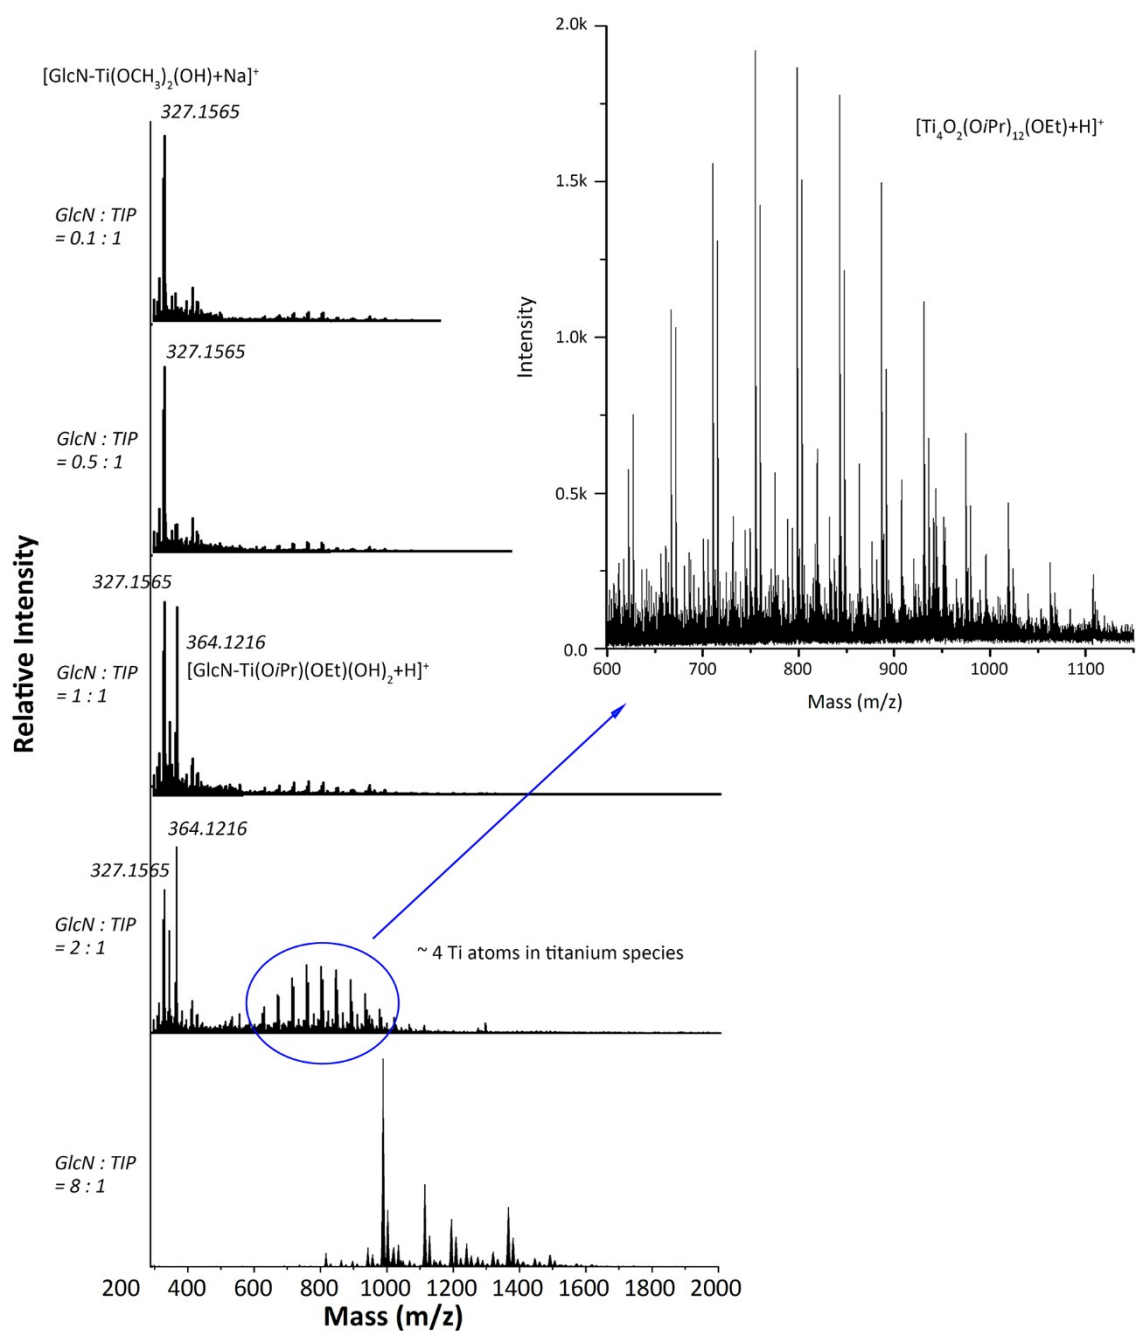

**Fig. S3.** The molar ratio between GlcN and TIP indeed played a decisive contribution in regulating the purity of Ti species.

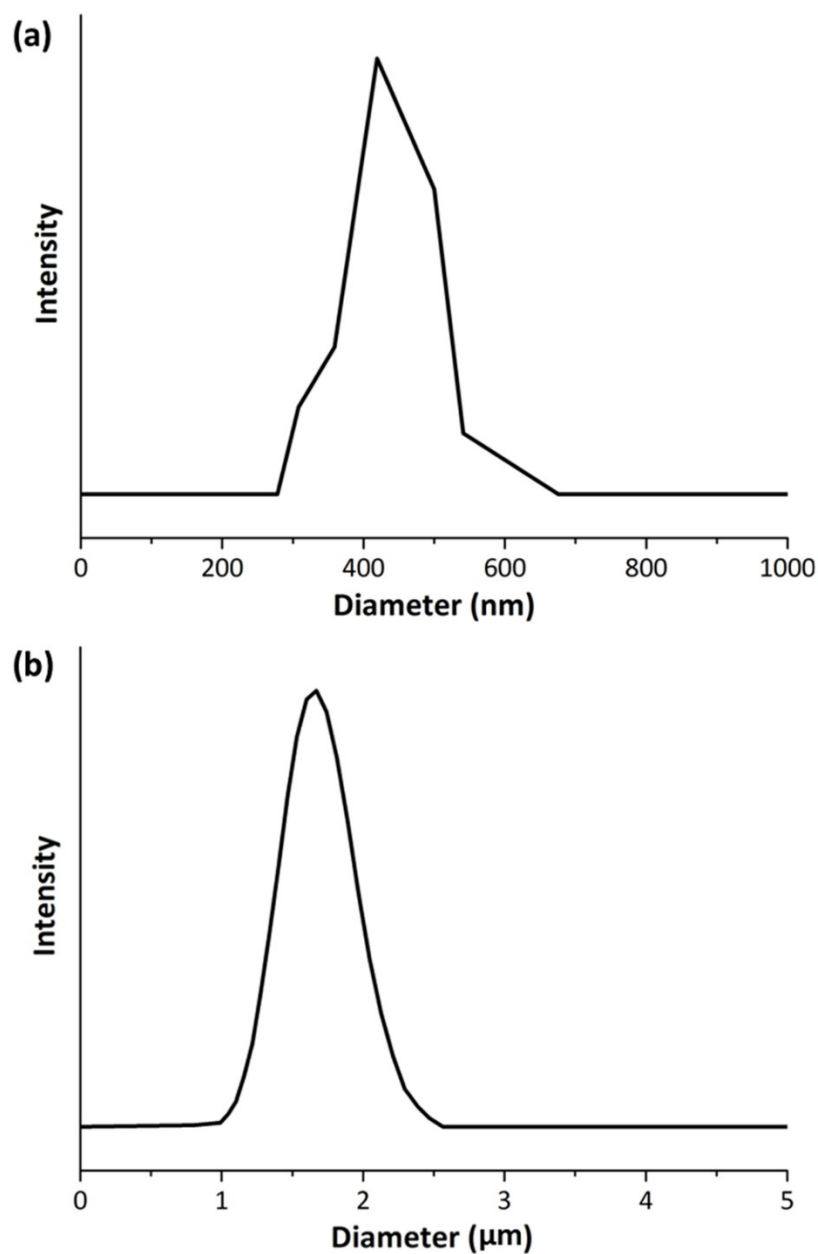

**Fig. S4.** In aqueous solution with a pH value of 7.4, hydrodynamic diameter of the amorphous TiO<sub>2</sub> microspheres prepared by different mass ratios of HDA/P123/GlcN: (a) 0/0/100% and (b) 24.9/28.7/46.4%. DLS data revealed that the integration of organic additives at an optimum mass ratio would have the greatest influence on the properties of amorphous TiO<sub>2</sub> microsphere. The TiO<sub>2</sub> in (a) exhibited a large size polydispersity index (> 0.3). After dispersed them in water for about 1 day, severe agglomeration and precipitation could be observed. However, the microspheres (b) had a low size polydispersity index (<0.1) and were stable for several months. Such TiO<sub>2</sub> sample was well dispersed without any sedimentation in a longer period.

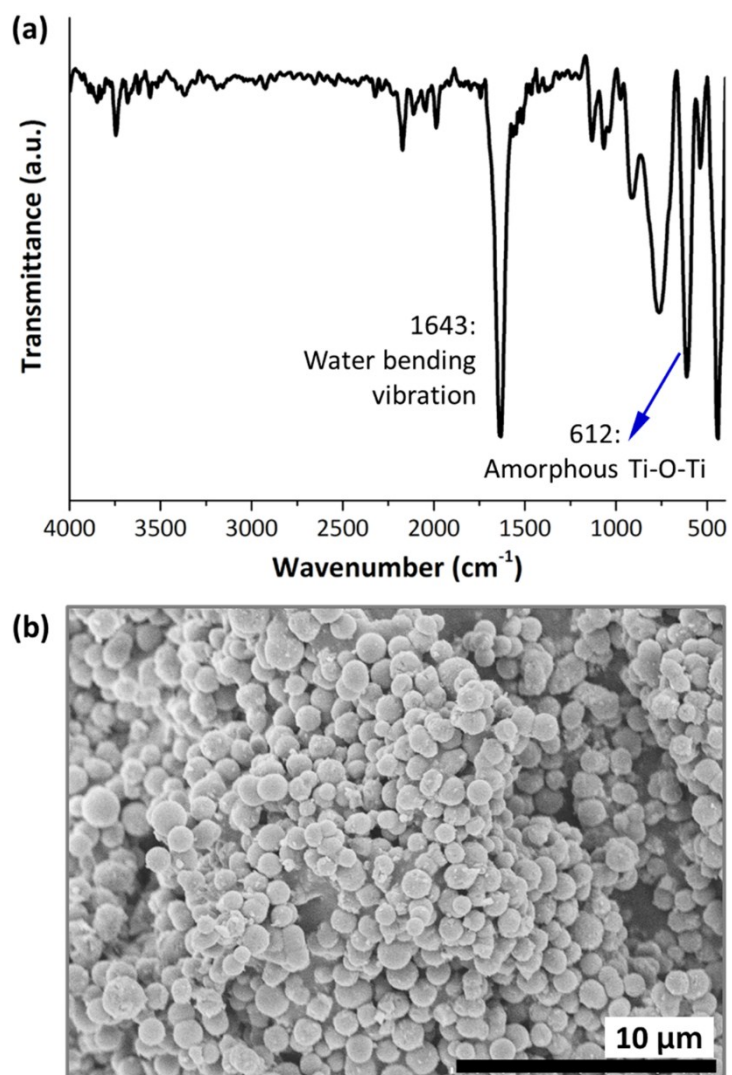

**Fig. S5.** (a) FTIR spectrum and (b) SEM image of the amorphous blank  $\text{TiO}_2$  microspheres prepared without any organic templates. The reaction recipe only contained 2.2 mL of TIP, 0.4 mL of KCl solution (0.1 M) and 100 mL of Isopropanol.

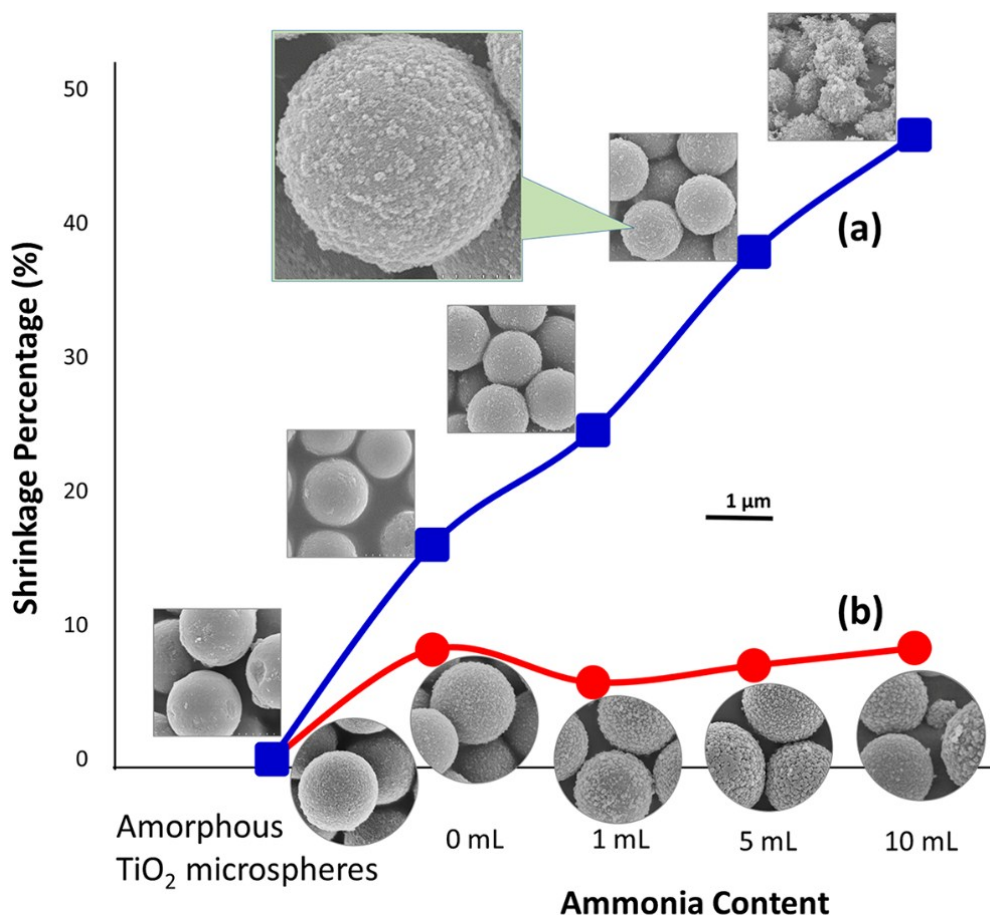

**Fig. S6.** Schematic diagram displaying the variations (e.g., size shrinkage and surface morphology evolution) of hydrothermally-treated amorphous TiO<sub>2</sub> microspheres with different mass ratios of HDA/P123/GlcN: 100/0/0% (blue curve) and 24.9/28.7/46.4% (red curve). Hydrothermal treatment was carried out in a Teflon-lined autoclave (50 mL) at 160 °C for 8 h. The amorphous TiO<sub>2</sub> microspheres were ultrasonically dispersed into a mixture adopting different relative amounts of ammonia, water, and ethanol (volume fraction of 0/10/20, 1/9/20, 2/8/20, 5/5/20, and 10/0/20 mL, respectively), keeping the total solvent volume constant.

To improve the porosity of TiO<sub>2</sub> crystallites, one popular method is to hydrothermally treat amorphous TiO<sub>2</sub> materials prior to calcination.<sup>1</sup> In a particular condition, for example a supercritical fluid that is formed in the autoclave at elevated pressure and temperature, amorphous TiO<sub>2</sub> materials exhibit a relatively high reactivity and mobility toward etching and reconstructions. Such self-ordering reactions through the chemical dissolution possibly brought the spiky core/shell, yolk/shell, hollow, porosity, and even entirely broken structures.<sup>2, 3</sup>

In view of substantial crystal densification, growth, and fusion of TiO<sub>2</sub> in the hydrothermal process, it was not surprising to observe a structural shrinkage in most reported research. For example, high-quality mesoporous TiO<sub>2</sub> microspheres designed by Caruso et al.<sup>4</sup> had a distinct shrinkage of 28% in diameter as compared to our unusual data of 8.3% in a

similar hydrothermal condition (Fig. S6b). To further experimentally confirm this difference, a control of TiO<sub>2</sub> amorphous microspheres prepared by only HDA was conducted. Increasing ammonia concentrations led to a distinct reduction in the size of TiO<sub>2</sub> microspheres (shown in Fig. S6a). Taking the sample hydrothermally-treated in 5 mL of ammonia as an example, the size decreased from 1.07 μm of its starting microsphere to 0.69 μm. A clear shrinkage as high as 36% in diameter was reached. It was a convincing evidence that even at the ammonia amount of 10 mL, GlcN additive could perform specific contribution in inhibiting the micro-structural shrinkage as phase transformation occurred. Nonetheless, when 10 mL of ammonia was added into hydrothermal treatments, the reaction of Ostwald ripening was largely activated, and therefore it can produce a few byproducts besides granular normal microsphere, e.g., irregular nano-sized aggregate.



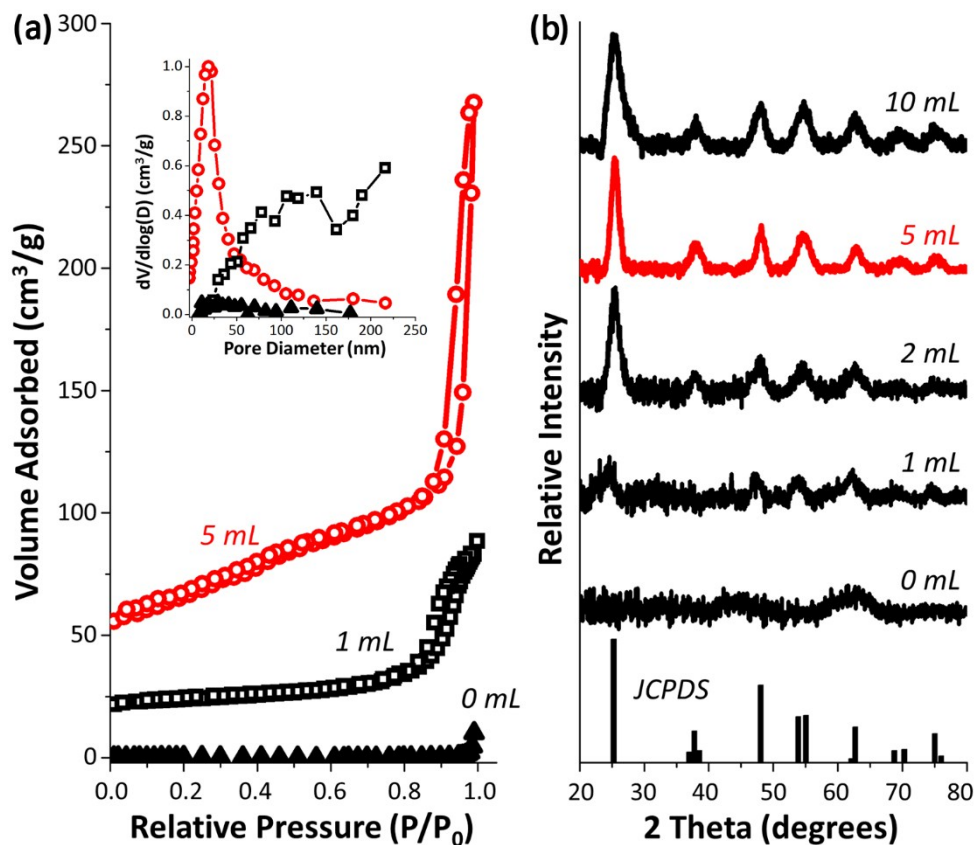

**Fig. S7.** The hydrothermally-treated amorphous microspheres using the mass ratio of HDA/P123/GlcN at 24.9/28.7/46.4% as a function of ammonia contents: 0, 1, 2, 5 and 10 mL. To understand the structural evolution from smooth precursors to eroded urchin-like titanium counterparts, the crystallization processes for the samples treated with different ammonia contents were investigated by (a) N<sub>2</sub> adsorption-desorption isotherms (inset: pore size distribution; To avoid the overlap of BET isotherms, only three representative curves of hydrothermally-treated samples were given) and (b) XRD analysis.

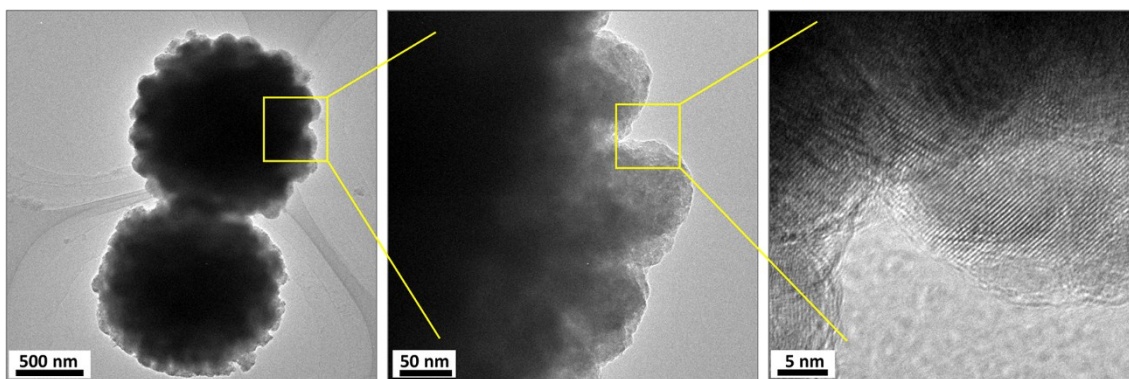

**Fig. S8.** The synthesis recipe without the use of GlcN always generated solid mesoporous  $\text{TiO}_2$  microsphere (denoted as M- $\text{TiO}_2$ ) after hydrothermal and calcined reactions.

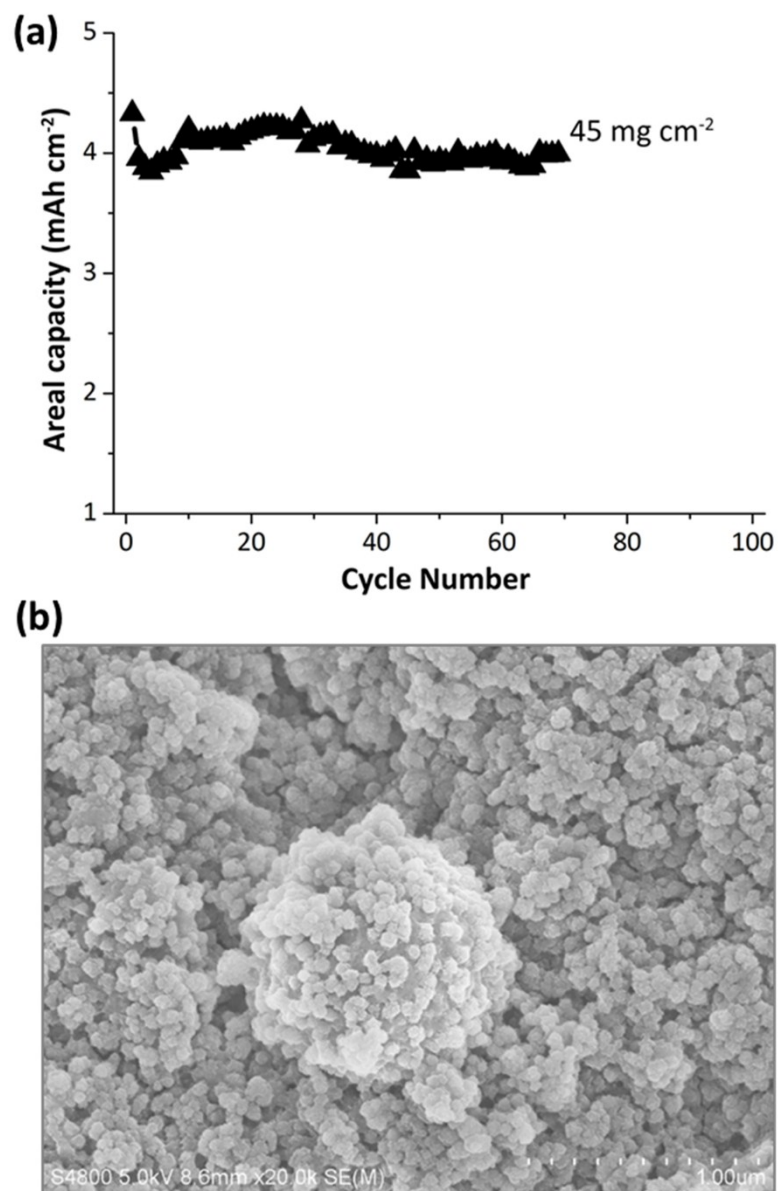

**Fig. S9.** (a) Cycling performance of pomegranate-like cluster anode with an areal mass loading at 45 mg cm<sup>-2</sup>. This anode was first cycled at 0.2 C for the first three three cycles and 5 C for the later cycles. (b) The SEM image of pomegranate-like cluster anodes with an areal mass loading at 45 mg cm<sup>-2</sup> after 1000 cycles at 5 C.

**Table S1.** Summary of the state-of-the-art gravimetric capability of titanium oxide-based anode materials for lithium-ion batteries (normalized 1C = 335 mA g<sup>-1</sup>).

| References                                                    | Materials                                                                                               | Cycle gravimetric capability (mAh g <sup>-1</sup> ) |            | Cycles      | Current rate | Rate gravimetric capability (mAh g <sup>-1</sup> ) |                 |
|---------------------------------------------------------------|---------------------------------------------------------------------------------------------------------|-----------------------------------------------------|------------|-------------|--------------|----------------------------------------------------|-----------------|
|                                                               |                                                                                                         | Initial                                             | End        |             |              | Initial                                            | End             |
| <b>This work</b>                                              | <b>A high-tap-density microcluster consisting of carbon-conformal hollow TiO<sub>2</sub> nanosphere</b> | <b>251</b>                                          | <b>197</b> | <b>1000</b> | <b>1C</b>    | <b>260@0.1C</b>                                    | <b>238@0.2C</b> |
|                                                               |                                                                                                         | <b>189</b>                                          | <b>160</b> | <b>1000</b> | <b>5C</b>    | <b>220@0.5C</b>                                    | <b>199@1C</b>   |
|                                                               |                                                                                                         | <b>176</b>                                          | <b>145</b> | <b>1000</b> | <b>10C</b>   | <b>178@2.5C</b>                                    | <b>150@10C</b>  |
| <i>Nano Lett.</i> , <b>2018</b> , <i>18</i> , 336             | Three-dimensional TiO <sub>2</sub> /Graphene Hybrid                                                     | 140                                                 | 150        | 2000        | 2C           | 210@0.1C                                           | 72@10C          |
| <i>J. Phys. Chem. B</i> , <b>2018</b> , <i>122</i> , 972      | Carbon nanotube@TiO <sub>2</sub> nanowires                                                              | 170                                                 | 150        | 100         | 0.06C        | 80@0.3C                                            | 50@1.5C         |
| <i>J. Mater. Chem. A</i> , <b>2018</b> , <i>6</i> , 1196      | TiO <sub>2</sub> -B microspheres                                                                        | 220                                                 | 202        | 100         | 5C           | 216@0.5C                                           | 181@10C         |
| <i>J. Mater. Chem. A</i> , <b>2018</b> , <i>6</i> , 1017      | MXenes-derived TiO <sub>2</sub> -graphene nanosheet                                                     | 105                                                 | 87         | 8000        | 3C           | 181@0.3C                                           | 79@6C           |
| <i>J. Alloy. Compd.</i> , <b>2018</b> , <i>731</i> , 844      | Mesoporous TiO <sub>2</sub> nanofiber bundles                                                           | 130                                                 | 141        | 500         | 0.5C         | 155@0.3C                                           | 72@4.8C         |
| <i>ChemSusChem</i> , <b>2018</b> , <i>11</i> , 299            | Single-crystal H <sub>2</sub> Ti <sub>12</sub> O <sub>25</sub> nanorods                                 | 193                                                 | 175        | 200         | 5C           | 220@0.5C                                           | 150@10C         |
| <i>Adv. Funct. Mater.</i> , <b>2017</b> , <i>27</i> , 1703270 | Anatase TiO <sub>2</sub> @TiO <sub>2</sub> (B) microspheres                                             | 180                                                 | 175        | 500         | 0.5C         | 220@0.1C                                           | 110@10C         |
| <i>Adv. Energy Mater.</i> , <b>2017</b> , <i>7</i> , 1602291  | TiO <sub>2</sub> inverse opal                                                                           | 320                                                 | 138        | 1000        | 0.22C        | 170@0.4C                                           | 130@1.3C        |
| <i>J. Mater. Chem. A</i> , <b>2017</b> , <i>5</i> , 24380     | Mesoporous carbonaceous/TiO <sub>2</sub>                                                                | 150                                                 | 140        | 50          | 1C           | 180@0.2C                                           | 147@1.7C        |
| <i>J. Mater. Chem. A</i> , <b>2017</b> , <i>5</i> , 23853     | Hollow TiO <sub>2</sub> -rGO nanocomposites                                                             | 138                                                 | 133        | 800         | 2.8C         | 247@0.1C                                           | 105@11C         |
| <i>J. Mater. Chem. A</i> , <b>2017</b> , <i>5</i> , 20651     | N-doped anatase TiO <sub>2</sub> nanotubes                                                              | \                                                   | \          | \           | \            | 190@0.07C                                          | 78@7.5C         |
| <i>J. Mater. Chem. A</i> , <b>2017</b> , <i>5</i> , 11764     | N-doped C-coated LiTi <sub>2</sub> (PO <sub>4</sub> ) <sub>3</sub>                                      | 125                                                 | 120        | 100         | 0.5C         | 126@0.08C                                          | 62@8.2C         |

|                                                             |                                                                                                                      |     |      |      |       |           |          |
|-------------------------------------------------------------|----------------------------------------------------------------------------------------------------------------------|-----|------|------|-------|-----------|----------|
| <i>J. Mater. Chem. A</i> ,<br><b>2017</b> , 5, 4359         | TiO <sub>2</sub> spheres with hierarchical pores                                                                     | 189 | 167  | 100  | 0.5C  | 233@0.05C | 88@2.5C  |
| <i>ACS Appl. Mater. Interfaces</i> , <b>2017</b> , 9, 36828 | Oriented TiO <sub>2</sub> nanotubes                                                                                  | 143 | 132  | 300  | 0.05C | 172@0.02C | 94@5C    |
| <i>ACS Appl. Mater. Interfaces</i> , <b>2017</b> , 9, 35917 | TiO <sub>2</sub> -B and anatase dual-phase nanowires                                                                 | 180 | 126  | 2000 | 30C   | 225@0.5C  | 140@30C  |
| <i>ACS Appl. Mater. Interfaces</i> , <b>2017</b> , 9, 20491 | Interpenetrated network of Graphitic carbon/TiO <sub>2</sub>                                                         | 150 | 140  | 1000 | 3C    | 216@0.3C  | 123@5.9C |
| <i>ACS Appl. Mater. Interfaces</i> , <b>2017</b> , 9, 4649  | Nanosheets consisting of spinel Li <sub>4</sub> Ti <sub>5</sub> O <sub>12</sub> and rutile TiO <sub>2</sub> lamellas | 133 | 125  | 500  | 25C   | 178@0.5C  | 148@10C  |
| <i>Nano Energy</i> , <b>2017</b> , 32, 294                  | Ti <sup>3+</sup> -free three-phase Li <sub>4</sub> Ti <sub>5</sub> O <sub>12</sub> /TiO <sub>2</sub> nanoplates      | 180 | 140  | 1000 | 12C   | 175@0.6C  | 155@24C  |
| <i>RSC Adv.</i> , <b>2017</b> , 7, 18745                    | Spinel Li <sub>4</sub> Ti <sub>5</sub> O <sub>12</sub> powder                                                        | 135 | 130  | 99   | 1C    | 164@0.05C | 132@1C   |
| <i>Electrochim. Acta</i> , <b>2017</b> , 255, 417           | N-rich TiO <sub>2</sub> @carbon nanosheets                                                                           | 275 | 136  | 500  | 5C    | 280@0.1C  | 75@10C   |
| <i>J. Electroanal. Chem.</i> , <b>2017</b> , 804, 87        | TiO <sub>2</sub> nanorods with rutile@anatase                                                                        | 130 | 84.7 | 5000 | 10C   | 148@0.5C  | 93.8@5C  |
| <i>J. Alloy. Compd.</i> , <b>2017</b> , 721, 545            | Li <sub>4</sub> Ti <sub>5</sub> O <sub>12</sub> @Carbon fibers                                                       | 175 | 173  | 50   | 0.5C  | 175@0.5C  | 109@10C  |
| <i>J. Am. Chem. Soc.</i> , <b>2016</b> , 138, 5916          | TiO <sub>2</sub> hollow microsphere                                                                                  | 172 | 170  | 50   | 0.05C | 175@0.05C | 107@5C   |
| <i>Adv. Funct. Mater.</i> , <b>2016</b> , 26, 4143          | Layered orthorhombic TiO <sub>2</sub> @Ti <sub>3</sub> C <sub>2</sub> T <sub>x</sub>                                 | 120 | 115  | 450  | 2.5C  | 179@0.25C | 96@5C    |
| <i>Chem. Sci.</i> , <b>2016</b> , 7, 793                    | TiO <sub>2</sub> hollow nanosphere                                                                                   | 125 | 110  | 3000 | 10C   | 196@0.5C  | 113@10C  |
| <i>Nano Energy</i> , <b>2016</b> , 21, 133                  | Crafting monodisperse Li <sub>4</sub> Ti <sub>5</sub> O <sub>12</sub> nanospheres                                    | 155 | 145  | 500  | 5C    | 170@0.25C | 135@25C  |

|                                                                     |                                                                                              |     |     |       |       |           |           |
|---------------------------------------------------------------------|----------------------------------------------------------------------------------------------|-----|-----|-------|-------|-----------|-----------|
| <i>ACS Appl. Mater. Interfaces</i> , <b>2016</b> , <i>8</i> , 20040 | Three-dimensional branched TiO <sub>2</sub>                                                  | 300 | 195 | 200   | 1C    | 223@0.5C  | 123@10C   |
| <i>RSC Adv.</i> , <b>2016</b> , <i>6</i> , 108310                   | TiO <sub>2</sub> @C nanospheres                                                              | 210 | 286 | 200   | 0.3C  | 225@0.3C  | 105@3C    |
| <i>RSC Adv.</i> , <b>2016</b> , <i>6</i> , 95512                    | Nanostructured Li <sub>4</sub> Ti <sub>5</sub> O <sub>12</sub> /PEDOT:PSS                    | 175 | 169 | 100   | 0.25C | 168@0.1C  | 161@5C    |
| <i>Nanoscale</i> , <b>2016</b> , <i>8</i> , 10928                   | Hierarchical TiO <sub>2</sub> -C heterostructure                                             | 200 | 188 | 200   | 0.25C | 203@0.1C  | 103@2.5C  |
| <i>ChemElectroChem</i> , <b>2016</b> , <i>3</i> , 871               | Layer-stacked anatase TiO <sub>2</sub>                                                       | 154 | 107 | 10000 | 3C    | 242@0.15C | 131@6C    |
| <i>J. Mater. Chem. A</i> , <b>2016</b> , <i>4</i> , 8172            | TiO <sub>2</sub> -B nanosheets with N-doped carbon                                           | 300 | 210 | 2200  | 1.5C  | 300@0.3C  | 180@17.9C |
| <i>J. Mater. Chem. A</i> , <b>2015</b> , <i>3</i> , 13706           | W <sup>6+</sup> and Br <sup>-</sup> co-doped Li <sub>4</sub> Ti <sub>5</sub> O <sub>12</sub> | 155 | 139 | 1000  | 5C    | 160@0.5C  | 121@10C   |
| <i>J. Mater. Chem. A</i> , <b>2015</b> , <i>3</i> , 6455            | Single-grain layer anatase TiO <sub>2</sub> nanosheet                                        | 110 | 73  | 4000  | 2.5C  | 200@0.5C  | 100@5C    |
| <i>ACS Appl. Mater. Interfaces</i> , <b>2015</b> , <i>7</i> , 10395 | Graphene@mesoporous TiO <sub>2</sub> @carbon nanosheet                                       | 150 | 125 | 200   | 0.6C  | 90@3C     | 65@15C    |
| <i>Nano Lett.</i> , <b>2015</b> , <i>15</i> , 2186                  | TiO <sub>2</sub> /graphene/TiO <sub>2</sub> sandwich like nanosheet                          | 252 | 237 | 100   | 0.06C | 238@0.1C  | 175@3C    |
| <i>J. Phys. Chem. C</i> , <b>2015</b> , <i>119</i> , 3923           | Single-Crystalline Anatase TiO <sub>2</sub> Cubes                                            | 206 | 200 | 100   | 0.25C | 246@0.1C  | 96@1C     |
| <i>Nanoscale</i> , <b>2015</b> , <i>7</i> , 17947                   | Monodisperse TiO <sub>2</sub> microspheres                                                   | 150 | 122 | 500   | 2.5C  | 220@0.1C  | 105@10C   |
| <i>Nanoscale</i> , <b>2015</b> , <i>7</i> , 13898                   | TiO <sub>2</sub> microfibers@N doped C composites                                            | 130 | 125 | 100   | 5C    | 200@0.5C  | 125@5C    |
| <i>Nanoscale</i> , <b>2015</b> , <i>7</i> , 12979                   | Yolk-shell TiO <sub>2</sub> porous microspheres                                              | 120 | 113 | 100   | 5C    | 237@0.5C  | 117@5C    |

**Table S2.** Summary of the state-of-the-art areal capability of titanium oxide-based anode materials for lithium-ion batteries.

| References                                                     | Materials                                                                                               | Cycle areal capability (mAh cm <sup>-2</sup> ) |             | Cycles      | Mass loading of active materials (mg cm <sup>-2</sup> ) | Current density (mA cm <sup>-2</sup> ) |
|----------------------------------------------------------------|---------------------------------------------------------------------------------------------------------|------------------------------------------------|-------------|-------------|---------------------------------------------------------|----------------------------------------|
|                                                                |                                                                                                         | Initial                                        | End         |             |                                                         |                                        |
| <b>This work</b>                                               | <b>A high-tap-density microcluster consisting of carbon-conformal hollow TiO<sub>2</sub> nanosphere</b> | <b>5.01</b>                                    | <b>4.79</b> | <b>1000</b> | <b>23.7</b>                                             | <b>26.0</b>                            |
|                                                                |                                                                                                         | <b>3.69</b>                                    | <b>3.20</b> | <b>1000</b> | <b>15.6</b>                                             | <b>26.0</b>                            |
|                                                                |                                                                                                         | <b>2.21</b>                                    | <b>1.80</b> | <b>1000</b> | <b>8.2</b>                                              | <b>26.0</b>                            |
| <i>Energy Environ. Sci.</i> , <b>2017</b> , <i>10</i> , 580    | Yolk-shell Si@TiO <sub>2</sub> nanoclusters                                                             | 3.1                                            | 2.0         | 50          | 2.1                                                     | 0.7                                    |
| <i>Adv. Mater.</i> , <b>2017</b> , <i>29</i> , 1700523         | Silicon@amorphous TiO <sub>2</sub> nanoparticles                                                        | 2.25                                           | 1.07        | 200         | 0.62                                                    | 0.26                                   |
| <i>J. Mater. Chem. A</i> , <b>2017</b> , <i>5</i> , 11764      | Nitrogen-doped carbon-coated LiTi <sub>2</sub> (PO <sub>4</sub> ) <sub>3</sub>                          | 1.44                                           | 1.32        | 80          | 10                                                      | 1.38                                   |
| <i>J. Alloy. Compd.</i> , <b>2017</b> , <i>712</i> , 90        | Anatase TiO <sub>2</sub> nanotube                                                                       | 0.088                                          | 0.075       | 50          | \                                                       | 0.05                                   |
|                                                                |                                                                                                         | \                                              | 0.075       | 100         | 0.43                                                    | 0.01                                   |
| <i>J. Electrochem. Soc.</i> , <b>2017</b> , <i>164</i> , E3114 | TiO <sub>2</sub> columnar nanostructures                                                                | 0.085                                          | 0.071       | 100         | 0.43                                                    | 0.14                                   |
|                                                                |                                                                                                         | \                                              | 0.069       | 100         | 0.43                                                    | 0.28                                   |
|                                                                |                                                                                                         | \                                              | 0.030       | 100         | 0.43                                                    | 0.70                                   |
|                                                                |                                                                                                         | 3.35                                           | 2.28        | 30          | 18.0                                                    | 6.03                                   |
| <i>J. Power Sources</i> , <b>2017</b> , <i>345</i> , 50        | Nanoengineered TiO <sub>2</sub> thick films                                                             | 2.88                                           | 2.12        | 30          | 15.5                                                    | 5.19                                   |
|                                                                |                                                                                                         | 2.25                                           | 1.77        | 30          | 12.5                                                    | 4.18                                   |
|                                                                |                                                                                                         | 1.89                                           | 1.41        | 30          | 10.5                                                    | 3.52                                   |
|                                                                |                                                                                                         | 1.25                                           | 0.95        | 30          | 3.4                                                     | 1.14                                   |
|                                                                |                                                                                                         | 0.61                                           | 0.47        | 30          | 3.0                                                     | 1.01                                   |
| <i>Adv. Funct. Mater.</i> , <b>2017</b> , <i>27</i> , 1703538  | SiO <sub>2</sub> /TiO <sub>2</sub> composite film                                                       | 1.73                                           | 0.85        | 50          | \                                                       | 0.05                                   |
|                                                                |                                                                                                         | 0.75                                           | 0.52        | 50          | \                                                       | 0.1                                    |
|                                                                |                                                                                                         | 0.66                                           | 0.49        | 50          | \                                                       | 0.2                                    |
|                                                                |                                                                                                         | 0.51                                           | 0.39        | 50          | \                                                       | 0.3                                    |
|                                                                |                                                                                                         | 0.47                                           | 0.24        | 50          | \                                                       | 0.5                                    |
| <i>Materials</i> , <b>2017</b> , <i>10</i> , 678               | Ternary CNTs@TiO <sub>2</sub> /CoO nanotubes                                                            | 1.24                                           | 0.31        | 50          | < 1.1                                                   | 0.05                                   |

|                                                                    |                                                            |      |      |      |      |      |
|--------------------------------------------------------------------|------------------------------------------------------------|------|------|------|------|------|
|                                                                    |                                                            | 0.41 | 0.41 | 5    | 1.91 | 1.01 |
| <i>J. Mater. Chem. A</i> ,<br><b>2016</b> , 4, 5542                | TiO <sub>2</sub> -SnO <sub>2</sub> nanotubes               | 1.61 | 0.49 | 400  | 1.91 | 0.50 |
|                                                                    |                                                            | 0.70 | 0.66 | 5    | 1.91 | 0.25 |
|                                                                    |                                                            | 0.85 | 0.78 | 5    | 1.91 | 0.10 |
|                                                                    |                                                            | 1.13 | 1.00 | 5    | 1.91 | 0.05 |
|                                                                    |                                                            | \    | 4.4  | 30   | 19.5 | 1.95 |
| <i>J. Mater. Chem. A</i> ,<br><b>2016</b> , 4, 7398                | Coaxial TiO <sub>2</sub> -carbon<br>nanotube sponges       | \    | 4.1  | 30   | 18.2 | 1.82 |
|                                                                    |                                                            | \    | 3.7  | 30   | 16.4 | 1.64 |
|                                                                    |                                                            | \    | 1.6  | 30   | 7.1  | 0.71 |
|                                                                    |                                                            | \    | 1.4  | 30   | 6.2  | 0.62 |
|                                                                    |                                                            | 0.32 | 0.27 | 50   | \    | 0.1  |
| <i>J. Mater. Chem. A</i> ,<br><b>2016</b> , 4, 10593               | TiO <sub>2</sub> nanotrees                                 | 0.25 | 0.21 | 5    | \    | 0.5  |
|                                                                    |                                                            | 0.19 | 0.15 | 400  | \    | 1.0  |
|                                                                    |                                                            | 0.15 | 0.14 | 5    | \    | 2.0  |
|                                                                    |                                                            | 0.01 | 0.01 | 5    | \    | 5.0  |
|                                                                    |                                                            | 0.07 | 0.07 | 5    | \    | 10.0 |
| <i>Electrochim. Acta</i> ,<br>2016, 198, 56                        | Anodic TiO <sub>2</sub> nanotubes                          | \    | 0.63 | \    | 2.4  | 0.02 |
| <i>ACS Appl. Mater.<br/>Interfaces</i> , <b>2016</b> , 8,<br>16670 | Anodized Ti <sub>3</sub> SiC <sub>2</sub>                  | 0.31 | 0.23 | 60   | \    | 0.5  |
|                                                                    |                                                            | 0.32 | 0.32 | 10   | \    | 0.3  |
|                                                                    |                                                            | 0.46 | 0.38 | 25   | \    | 0.2  |
| <i>J. Power Sources</i> ,<br><b>2015</b> , 282, 187                | Three-dimensional<br>porous TiO <sub>2</sub> /carbon fiber | \    | 3.90 | \    | 54.1 | 1.8  |
|                                                                    |                                                            | \    | 2.49 | \    | 54.1 | 18.1 |
|                                                                    |                                                            | \    | 1.15 | \    | 54.1 | 36.2 |
|                                                                    |                                                            | \    | 2.98 | \    | 40.2 | 1.3  |
|                                                                    |                                                            | \    | 2.03 | \    | 40.2 | 13.4 |
|                                                                    |                                                            | \    | 1.30 | \    | 40.2 | 26.8 |
|                                                                    |                                                            | \    | 1.50 | \    | 21.9 | 0.73 |
|                                                                    |                                                            | \    | 1.02 | \    | 21.9 | 7.3  |
| \                                                                  | 0.91                                                       | \    | 21.9 | 14.6 |      |      |



|                                                    |                                           |      |     |    |    |     |
|----------------------------------------------------|-------------------------------------------|------|-----|----|----|-----|
| <i>Electrochim. Acta,</i><br><b>2015, 163, 246</b> | Two-dimensional metal<br>carbides         | 7.45 | 1.7 | 50 | 50 | 1.5 |
|                                                    |                                           | 8.51 | 2.2 | 50 | 35 | 1.5 |
|                                                    |                                           | 7.14 | 2.0 | 50 | 18 | 1.5 |
|                                                    | Two-dimensional<br>metal/carbon composite | 16.0 | 4.9 | 50 | 50 | 1.5 |
|                                                    |                                           | 6.0  | 2.8 | 50 | 35 | 1.5 |
|                                                    |                                           | 7.7  | 2.1 | 50 | 18 | 1.5 |

---

**Table S3.** Summary of the state-of-the-art volumetric capability of titanium oxide-based anode materials for lithium-ion batteries (normalized 1C = 335 mA g<sup>-1</sup>).

| References                                               | Materials                                                                                               | Cycle volumetric capability (mAh cm <sup>-3</sup> ) |             | Cycles      | Mass loading of active materials (mg cm <sup>-2</sup> ) | Current rate |
|----------------------------------------------------------|---------------------------------------------------------------------------------------------------------|-----------------------------------------------------|-------------|-------------|---------------------------------------------------------|--------------|
|                                                          |                                                                                                         | Initial                                             | End         |             |                                                         |              |
| <b>This work</b>                                         | <b>A high-tap-density microcluster consisting of carbon-conformal hollow TiO<sub>2</sub> nanosphere</b> | <b>970</b>                                          | <b>954</b>  | <b>10</b>   | <b>8.2</b>                                              | <b>5.0C</b>  |
|                                                          |                                                                                                         | <b>1058</b>                                         | <b>1019</b> | <b>5</b>    | <b>15.6</b>                                             | <b>0.1C</b>  |
|                                                          |                                                                                                         | <b>973</b>                                          | <b>956</b>  | <b>5</b>    | <b>15.6</b>                                             | <b>0.2C</b>  |
|                                                          |                                                                                                         | <b>955</b>                                          | <b>931</b>  | <b>5</b>    | <b>15.6</b>                                             | <b>0.5C</b>  |
|                                                          |                                                                                                         | <b>942</b>                                          | <b>900</b>  | <b>5</b>    | <b>15.6</b>                                             | <b>1.0C</b>  |
|                                                          |                                                                                                         | <b>919</b>                                          | <b>885</b>  | <b>5</b>    | <b>15.6</b>                                             | <b>2.5C</b>  |
|                                                          |                                                                                                         | <b>871</b>                                          | <b>856</b>  | <b>1000</b> | <b>15.6</b>                                             | <b>5.0C</b>  |
|                                                          |                                                                                                         | <b>804</b>                                          | <b>786</b>  | <b>10</b>   | <b>23.7</b>                                             | <b>5.0C</b>  |
| <i>ChemSusChem</i> ,<br><b>2018</b> , 11, 299            | Single-crystal H <sub>2</sub> Ti <sub>12</sub> O <sub>25</sub> nanorods                                 | 497                                                 | 325         | 10          | 3.7                                                     | 0.3C         |
|                                                          |                                                                                                         | 320                                                 | 303         | 100         | 3.7                                                     | 0.6C         |
|                                                          |                                                                                                         | 293                                                 | 283         | 10          | 3.7                                                     | 1.2C         |
|                                                          |                                                                                                         | 250                                                 | 258         | 10          | 3.7                                                     | 3.0C         |
|                                                          |                                                                                                         | 239                                                 | 222         | 10          | 3.7                                                     | 6.0C         |
|                                                          |                                                                                                         | 163                                                 | 160         | 10          | 3.7                                                     | 12.0C        |
| <i>Energy Environ. Sci.</i> ,<br><b>2017</b> , 10, 580   | Yolk-shell Si@TiO <sub>2</sub> nanoclusters                                                             | \                                                   | 930         | 100         | 2.1                                                     | 0.5C         |
| <i>J. Mater. Chem. A</i> ,<br><b>2017</b> , 5, 330       | Titanium phosphate thin films                                                                           | 335                                                 | 330         | 100         | ≈ 2.8                                                   | 1C           |
| <i>Nano Energy</i> , <b>2017</b> ,<br>31, 377            | A two-layer anode: porous TiO <sub>2</sub> /non-porous TiO <sub>2</sub>                                 | 450                                                 | 440         | 5           | 2.9                                                     | 0.1C         |
|                                                          |                                                                                                         | 370                                                 | 360         | 5           | 2.9                                                     | 0.5C         |
|                                                          |                                                                                                         | 255                                                 | 255         | 5           | 2.9                                                     | 1.0C         |
|                                                          |                                                                                                         | 125                                                 | 120         | 5           | 2.9                                                     | 2.0C         |
|                                                          |                                                                                                         | 75                                                  | 70          | 5           | 2.9                                                     | 4.0C         |
| <i>Adv. Funct. Mater.</i> ,<br><b>2017</b> , 27, 1703538 | SiO <sub>2</sub> /TiO <sub>2</sub> composite film                                                       | 841                                                 | 708         | 50          | \                                                       | 0.1C         |
|                                                          |                                                                                                         | 624                                                 | 433         | 50          | \                                                       | 0.5C         |
|                                                          |                                                                                                         | 549                                                 | 408         | 50          | \                                                       | 1.0C         |
|                                                          |                                                                                                         | 424                                                 | 324         | 50          | \                                                       | 2.0C         |
|                                                          |                                                                                                         | 391                                                 | 199         | 50          | \                                                       | 4.0C         |
|                                                          |                                                                                                         | ---                                                 | ---         | ---         | ---                                                     | ---          |

|                                                       |                                                                                                                                                                                    |     |       |     |       |        |       |       |
|-------------------------------------------------------|------------------------------------------------------------------------------------------------------------------------------------------------------------------------------------|-----|-------|-----|-------|--------|-------|-------|
|                                                       |                                                                                                                                                                                    | 118 | 105   | 5   | 24    | 0.1C   |       |       |
| <i>Sci China Mater.</i> ,<br><b>2017</b> , 60, 304    | Mesoporous TiO <sub>2</sub><br>submicrospheres                                                                                                                                     | 95  | 90    | 5   | 24    | 0.2C   |       |       |
|                                                       |                                                                                                                                                                                    | 78  | 75    | 5   | 24    | 0.5C   |       |       |
|                                                       |                                                                                                                                                                                    | 70  | 60    | 5   | 24    | 1.0C   |       |       |
|                                                       |                                                                                                                                                                                    |     |       |     |       |        |       |       |
| <i>Adv. Funct. Mater.</i> ,<br><b>2016</b> , 26, 4143 | Layered orthorhombic<br>TiO <sub>2</sub> @Ti <sub>3</sub> C <sub>2</sub> T <sub>x</sub><br>Layered orthorhombic<br>TiO <sub>2</sub> @Ti <sub>3</sub> C <sub>2</sub> T <sub>x</sub> | 355 | \     | 1   | 21    | 0.2C   |       |       |
|                                                       |                                                                                                                                                                                    | 274 | \     | 1   | 21    | 1.0C   |       |       |
|                                                       |                                                                                                                                                                                    | 141 | \     | 1   | 2.65  | 0.25C  |       |       |
|                                                       |                                                                                                                                                                                    | 113 | \     | 1   | 2.65  | 1.0C   |       |       |
| <i>J. Mater. Chem. A</i> ,<br><b>2016</b> , 4, 10593  | TiO <sub>2</sub> nanotrees                                                                                                                                                         | \   | 330   | 50  | \     | ≈ 0.3C |       |       |
|                                                       |                                                                                                                                                                                    | 198 | 193   | 5   | 2.0   | 0.05C  |       |       |
|                                                       |                                                                                                                                                                                    | 187 | 190   | 5   | 2.0   | 0.25C  |       |       |
|                                                       |                                                                                                                                                                                    | 178 | 178   | 5   | 2.0   | 0.5C   |       |       |
|                                                       |                                                                                                                                                                                    | 175 | 175   | 5   | 2.0   | 1.0C   |       |       |
| <i>Nano Energy</i> , <b>2016</b> ,<br>21, 133         | Crafting monodisperse<br>Li <sub>4</sub> Ti <sub>5</sub> O <sub>12</sub> nanospheres                                                                                               | 171 | 170   | 5   | 2.0   | 2.5C   |       |       |
|                                                       |                                                                                                                                                                                    | 170 | 159   | 500 | 2.0   | 5.0C   |       |       |
|                                                       |                                                                                                                                                                                    | 156 | 160   | 5   | 2.0   | 10C    |       |       |
|                                                       |                                                                                                                                                                                    | 155 | 155   | 5   | 2.0   | 15C    |       |       |
|                                                       |                                                                                                                                                                                    | 143 | 150   | 5   | 2.0   | 25C    |       |       |
|                                                       |                                                                                                                                                                                    | 115 | 108   | 5   | 2.0   | 40C    |       |       |
|                                                       |                                                                                                                                                                                    |     |       | 340 | 300   | 5      | 1.25  | 0.08C |
|                                                       |                                                                                                                                                                                    |     |       | 265 | 260   | 5      | 1.25  | 0.21C |
| <i>Chemelectrochem</i> ,<br><b>2016</b> , 3, 1301     | Beaded stream-like<br>Li <sub>4</sub> Ti <sub>5</sub> O <sub>12</sub> nanoparticles                                                                                                | 270 | 250   | 500 | 1.25  | 0.42C  |       |       |
|                                                       |                                                                                                                                                                                    | 250 | 248   | 5   | 1.25  | 0.84C  |       |       |
|                                                       |                                                                                                                                                                                    | 246 | 225   | 500 | 1.25  | 2.1C   |       |       |
|                                                       |                                                                                                                                                                                    | 220 | 215   | 5   | 1.25  | 4.2C   |       |       |
|                                                       |                                                                                                                                                                                    | 210 | 198   | 5   | 1.25  | 8.4C   |       |       |
|                                                       |                                                                                                                                                                                    |     |       | 412 | 231   | 100    | ≈ 1.7 | 0.3C  |
|                                                       |                                                                                                                                                                                    |     |       | 209 | 207   | 5      | ≈ 1.7 | 0.6C  |
| <i>Electrochim. Acta</i> ,<br><b>2016</b> , 202, 203  | Hierarchical rutile TiO <sub>2</sub><br>with mesocrystalline<br>structure                                                                                                          | 171 | 165   | 5   | ≈ 1.7 | 1.5C   |       |       |
|                                                       |                                                                                                                                                                                    | 141 | 138   | 5   | ≈ 1.7 | 3.0C   |       |       |
|                                                       |                                                                                                                                                                                    | 113 | 109   | 5   | ≈ 1.7 | 6.0C   |       |       |
|                                                       |                                                                                                                                                                                    |     |       |     |       |        |       |       |
| <i>Adv. Sci.</i> , <b>2015</b> , 2,<br>1500070        | Mesoporous TiO <sub>2</sub><br>nanowire bundles                                                                                                                                    | 295 | 283.6 | 100 | ≈ 3.2 | 0.5C   |       |       |

|                                                                   |                                                         |      |      |     |       |       |
|-------------------------------------------------------------------|---------------------------------------------------------|------|------|-----|-------|-------|
| <i>Int. J. Electrochem. Sci.</i> , <b>2015</b> , <i>10</i> , 8993 | TiO <sub>2</sub> @carbon nanostructure                  | 160  | 42.6 | 10  | 0.6   | 0.15C |
|                                                                   |                                                         | 40.3 | 36.4 | 10  | 0.6   | 0.3C  |
|                                                                   |                                                         | 35.8 | 31.2 | 10  | 0.6   | 0.6C  |
|                                                                   |                                                         | 27.3 | 23.4 | 10  | 0.6   | 1.5C  |
| <i>J. Power Sources</i> , <b>2015</b> , <i>282</i> , 187          | Three-dimensional porous TiO <sub>2</sub> /carbon fiber | 39.0 | \    | 1   | 40.2  | 0.1C  |
|                                                                   |                                                         | 27.5 | \    | 1   | 40.2  | 1.0C  |
|                                                                   |                                                         | 21.2 | \    | 1   | 40.2  | 2.0C  |
|                                                                   |                                                         | 467  | \    | 1   | 2.0   | 0.18C |
|                                                                   | 450                                                     | \    | 1    | 2.0 | 0.44C |       |
|                                                                   | 445                                                     | \    | 1    | 2.0 | 0.89C |       |
|                                                                   | 435                                                     | \    | 1    | 2.0 | 1.78C |       |
|                                                                   | 430                                                     | \    | 1    | 2.0 | 2.67C |       |
|                                                                   | 425                                                     | \    | 1    | 2.0 | 3.56C |       |
|                                                                   | 422                                                     | \    | 1    | 2.0 | 4.44C |       |
|                                                                   | 416                                                     | \    | 1    | 2.0 | 7.11C |       |
|                                                                   | 410                                                     | \    | 1    | 2.0 | 8.89C |       |
|                                                                   | 405                                                     | \    | 1    | 2.0 | 13.3C |       |
|                                                                   | 387                                                     | \    | 1    | 2.0 | 17.8C |       |
| <i>J. Power Sources</i> , <b>2015</b> , <i>273</i> , 923          | TiO <sub>2</sub> (B) secondary microspheres             | 460  | \    | 1   | 2.0   | 0.18C |
|                                                                   |                                                         | 455  | \    | 1   | 2.0   | 0.44C |
|                                                                   |                                                         | 438  | \    | 1   | 2.0   | 0.89C |
|                                                                   |                                                         | 405  | \    | 1   | 2.0   | 1.78C |
|                                                                   | Needle-like TiO <sub>2</sub> (B)                        | 398  | \    | 1   | 2.0   | 2.67C |
|                                                                   |                                                         | 376  | \    | 1   | 2.0   | 3.56C |
|                                                                   |                                                         | 355  | \    | 1   | 2.0   | 4.44C |
|                                                                   |                                                         | 330  | \    | 1   | 2.0   | 7.11C |
|                                                                   |                                                         | 310  | \    | 1   | 2.0   | 8.89C |
|                                                                   |                                                         | 275  | \    | 1   | 2.0   | 13.3C |
|                                                                   |                                                         | 248  | \    | 1   | 2.0   | 17.8C |

## References:

- 1 W. Li, Z. Wu, J. Wang, A. Elzatahry and D. Zhao, *Chem. Mater.*, 2014, **26**, 287-298.
- 2 L. Cao, D. Chen and R. A. Caruso, *Angew. Chem. Int. Ed.*, 2013, **52**, 10986-10991.
- 3 K. Lee, A. Mazare and P. Schmuki, *Chem. Rev.*, 2014, **114**, 9385-9454.
- 4 D. Chen, F. Huang, Y. Cheng and R. A. Caruso, *Adv. Mater.*, 2009, **21**, 2206-2210.
